# Supplementary material for: Cortisol as an Independent Predictor of Unfavorable Outcomes in Hospitalized COVID-19 Patients
Source: MDPI journal article supplement (doi:10.3390/biomedicines10071527), 2022-06-28
Supplement: s1 [file s1]

Table S1: Laboratory norms and methods.

|    | Parameter   | Reference norm with units                                                       | Laboratory                                                              | Analytical method              | Analyzer             |
|----|-------------|---------------------------------------------------------------------------------|-------------------------------------------------------------------------|--------------------------------|----------------------|
| 1. | ACTH        | 7.20-63.30 pg/ml                                                                | Diagnostyka Laboratoria, Gdańsk, Poland                                 | Electrochemiluminescence assay | Cobas 8000, Roche    |
| 2. | cortisol    | 6.02-18.4 µg/dl (6:00-10:00 AM)                                                 | Diagnostyka Laboratoria, Gdańsk, Poland                                 | Electrochemiluminescence assay | Cobas 8000, Roche    |
| 3. | CRP         | 0-5 mg/l                                                                        | Diagnostyka Laboratoria, Gdańsk, Poland                                 | Immunoturbidimetric assay      | Cobas 6000, Roche    |
| 4. | IL-6        | <5.9 pg/ml                                                                      | Central Clinical Laboratory, University Clinical Centre, Gdańsk, Poland | Chemiluminescence immunoassay  | Immulite XP, Siemens |
| 5. | leukocytes  | females: 3.98-10.04x10 <sup>3</sup> /µl<br>males: 4.23-9.07x10 <sup>3</sup> /µl | Diagnostyka Laboratoria, Gdańsk, Poland                                 | Fluorescence flow cytometry    | XT-4000i, Sysmex     |
| 6. | neutrocytes | 2-7x10 <sup>3</sup> /µl                                                         | Diagnostyka Laboratoria, Gdańsk, Poland                                 | Fluorescence flow cytometry    | XT-4000i, Sysmex     |
| 7. | lymphocytes | 1-3x10 <sup>3</sup> /µl                                                         | Diagnostyka Laboratoria, Gdańsk, Poland                                 | Fluorescence flow cytometry    | XT-4000i, Sysmex     |
